# Supplementary material
Source: PubMed Central journal article supplement (PMC2718348)
Supplement: 0900992106_ST1_PDF.pdf [file 0900992106_ST1_PDF.pdf]

**SI Table 1. Rice varieties for SNP discovery.**

| <b>IRIS GID</b> | <b>Variety Name (Abbr.)</b>    | <b>Species</b>   | <b>Seed Source</b>             | <b>Country of Origin</b> | <b>Variety Group</b> |
|-----------------|--------------------------------|------------------|--------------------------------|--------------------------|----------------------|
| 2254728         | Nipponbare (Npb)               | <i>O. sativa</i> | IRTP 23787                     | Japan                    | Temp japonica        |
| 2021623         | Tainung 67 (TNG67)             | <i>O. sativa</i> | Academia Sinica, Taiwan        | Taiwan                   | Temp japonica        |
| 2254732         | Li-Jiang-Xin-Tuan-Hei-Gu (LTH) | <i>O. sativa</i> | IRGC 59323                     | China                    | Temp japonica        |
| 2254738         | M 202                          | <i>O. sativa</i> | IRGC 77142                     | United States            | Temp japonica        |
| 2254730         | Azucena (Azu)                  | <i>O. sativa</i> | IRTP 4209                      | Philippines              | Trop japonica        |
| 2254722         | Moroberekan (Moro)             | <i>O. sativa</i> | IRGC 12048                     | Guinea                   | Trop japonica        |
| 2254737         | Cypress (Cyp)                  | <i>O. sativa</i> | IRRI Plant Breeding            | United States            | Trop japonica        |
| 2254723         | Dom-Sufid (Doms)               | <i>O. sativa</i> | IRGC 12880                     | Iran                     | Aromatic             |
| 2254720         | N 22                           | <i>O. sativa</i> | IRGC 4819                      | India                    | Aus                  |
| 2254725         | Dular                          | <i>O. sativa</i> | IRGC 32561                     | India                    | Aus                  |
| 2254721         | FR13 A                         | <i>O. sativa</i> | IRGC 6144                      | India                    | Aus                  |
| 2254724         | Aswina (Asw)                   | <i>O. sativa</i> | IRGC 26289                     | Bangladesh               | Deep-water type 3    |
| 2254726         | Rayada (Ray)                   | <i>O. sativa</i> | IRGC 77210                     | Bangladesh               | Deep-water type 4    |
| 2254729         | IR64-21                        | <i>O. sativa</i> | IRRI Plant Breeding            | Philippines              | Indica               |
| 2254731         | Shan-Huang Zhan-2 (SHZ2)       | <i>O. sativa</i> | IRTP 16338                     | China                    | Indica               |
| 2254727         | Pokkali (Pok)                  | <i>O. sativa</i> | IRGC 108921                    | India                    | Indica               |
| 2254736         | Swarna (Swar)                  | <i>O. sativa</i> | IRRI Plant Breeding            | India                    | Indica               |
| 2254719         | Sadu-Cho (Sadu)                | <i>O. sativa</i> | IRGC 2243                      | Korea                    | Indica               |
| 2030504         | Minghui 63 (MH63)              | <i>O. sativa</i> | Huazhong Ag. Un., Wuhan, China | China                    | Indica               |
| 2030525         | Zhenshan 97B (ZS97B)           | <i>O. sativa</i> | Huazhong Ag. Un., Wuhan, China | China                    | Indica               |
