# Supplementary material
Source: PubMed Central journal article supplement (PMC2718348)
Supplement: 0900992106_ST2_PDF.pdf [file 0900992106_ST2_PDF.pdf]

**Table S2. Number of MB and ML SNP predictions at all and non-repetitive sites, with varieties grouped by subpopulation.** The two performance measures [recall, FDR] are given in % in squared brackets. N/A denotes FDRs that could not be assessed as no predictions were made. Note that Nipponbare was excluded from both the dideoxy SNP set and the ML predictions.

| Variety      | All SNP sites          |                      |                      |                      | Non-repetitive SNP sites |                      |                      |                      |
|--------------|------------------------|----------------------|----------------------|----------------------|--------------------------|----------------------|----------------------|----------------------|
|              | MBML-union             | MBML-intersect       | MB Only              | ML Only              | MBML-union               | MBML-intersect       | MB Only              | ML Only              |
| Nipponbare   | 5,425 [N/A, N/A]       | 0 [N/A, N/A]         | 5,425 [N/A, N/A]     | 0 [N/A, N/A]         | 3,968 [N/A, N/A]         | 0 [N/A, N/A]         | 3,968 [N/A, N/A]     | 0 [N/A, N/A]         |
| LTH          | 22,233 [66.7, 00.0]    | 3,021 [16.7, 00.0]   | 17,240 [50.0, 00.0]  | 1,972 [00.0, N/A]    | 19,547 [66.7, 00.0]      | 2,912 [16.7, 00.0]   | 14,908 [50.0, 00.0]  | 1,727 [00.0, N/A]    |
| M 202        | 27,967 [33.3, 00.0]    | 5,295 [08.3, 00.0]   | 16,972 [25.0, 00.0]  | 5,700 [00.0, N/A]    | 25,258 [33.3, 00.0]      | 5,198 [08.3, 00.0]   | 14,549 [25.0, 00.0]  | 5,511 [00.0, N/A]    |
| Tainung 67   | 12,650 [66.7, 00.0]    | 0 [00.0, N/A]        | 12,648 [66.7, 00.0]  | 2 [00.0, N/A]        | 10,755 [66.7, 00.0]      | 0 [00.0, N/A]        | 10,753 [66.7, 00.0]  | 2 [00.0, N/A]        |
| Azucena      | 47,343 [23.2, 16.1]    | 15,269 [07.1, 20.0]  | 16,735 [02.7, 00.0]  | 15,339 [13.4, 16.7]  | 43,816 [23.2, 16.1]      | 14,981 [07.1, 20.0]  | 14,203 [02.7, 00.0]  | 14,632 [13.4, 16.7]  |
| Cypress      | 60,362 [18.5, 16.7]    | 23,984 [09.0, 05.6]  | 15,044 [02.1, 33.3]  | 21,334 [07.4, 22.2]  | 55,957 [18.5, 16.7]      | 23,489 [09.0, 05.6]  | 12,348 [02.1, 33.3]  | 20,120 [07.4, 22.2]  |
| Moroberekan  | 55,202 [12.6, 09.1]    | 22,044 [05.7, 00.0]  | 13,668 [00.6, 50.0]  | 19,490 [06.3, 09.1]  | 50,889 [12.6, 09.1]      | 21,565 [05.7, 00.0]  | 11,079 [00.6, 50.0]  | 18,245 [06.3, 09.1]  |
| Dom-sufid    | 56,090 [04.7, 33.3]    | 2,029 [00.0, N/A]    | 53,013 [04.7, 33.3]  | 1,048 [00.0, N/A]    | 51,817 [04.7, 33.3]      | 2,022 [00.0, N/A]    | 48,747 [04.7, 33.3]  | 1,048 [00.0, N/A]    |
| Dular        | 148,428 [22.0, 12.0]   | 64,039 [10.8, 00.0]  | 33,232 [02.0, 33.3]  | 51,157 [09.2, 17.8]  | 140,576 [22.0, 12.0]     | 62,977 [10.8, 00.0]  | 28,742 [02.0, 33.3]  | 48,857 [09.2, 17.8]  |
| FR13 A       | 150,221 [26.9, 14.5]   | 66,689 [12.2, 02.0]  | 34,276 [02.8, 26.7]  | 49,256 [11.9, 21.7]  | 142,866 [26.9, 14.5]     | 65,863 [12.2, 02.0]  | 29,163 [02.8, 26.7]  | 47,840 [11.9, 21.7]  |
| N 22         | 126,818 [20.8, 10.9]   | 58,575 [11.6, 06.3]  | 29,584 [02.8, 06.7]  | 38,659 [06.5, 19.5]  | 120,451 [20.8, 10.9]     | 57,805 [11.6, 06.3]  | 25,469 [02.8, 06.7]  | 37,177 [06.5, 19.5]  |
| Rayada       | 152,094 [29.0, 05.6]   | 66,476 [14.8, 00.0]  | 34,154 [02.7, 12.5]  | 51,464 [11.6, 10.3]  | 144,562 [29.0, 05.6]     | 65,570 [14.8, 00.0]  | 29,404 [02.7, 12.5]  | 49,588 [11.6, 10.3]  |
| Aswina       | 160,002 [30.4, 08.8]   | 67,272 [12.9, 00.0]  | 33,926 [05.0, 20.0]  | 58,804 [12.5, 11.8]  | 151,662 [30.4, 08.8]     | 66,152 [12.9, 00.0]  | 29,261 [05.0, 20.0]  | 56,249 [12.5, 11.8]  |
| IR64-21      | 137,327 [26.5, 07.0]   | 58,554 [11.9, 00.0]  | 32,989 [02.6, 33.3]  | 45,784 [11.9, 05.3]  | 130,244 [26.5, 07.0]     | 57,686 [11.9, 00.0]  | 28,515 [02.6, 33.3]  | 44,043 [11.9, 05.3]  |
| Minghui 63   | 139,979 [29.8, 07.0]   | 60,967 [14.0, 04.2]  | 30,414 [03.4, 10.5]  | 48,598 [12.3, 09.0]  | 133,496 [29.8, 07.0]     | 60,237 [14.0, 04.2]  | 25,875 [03.4, 10.5]  | 47,384 [12.3, 09.0]  |
| Pokkali      | 132,086 [18.9, 10.9]   | 56,099 [08.2, 06.1]  | 34,382 [01.8, 23.1]  | 41,605 [08.9, 12.3]  | 125,448 [18.9, 10.9]     | 55,402 [08.2, 06.1]  | 29,741 [01.8, 23.1]  | 40,305 [08.9, 12.3]  |
| SHZ2         | 114,132 [21.9, 13.6]   | 48,268 [11.8, 00.0]  | 33,708 [03.5, 37.5]  | 32,156 [06.7, 17.1]  | 108,791 [21.9, 13.6]     | 47,804 [11.8, 00.0]  | 29,603 [03.5, 37.5]  | 31,384 [06.7, 17.1]  |
| Sadu-Cho     | 144,528 [21.2, 08.8]   | 60,971 [08.9, 00.0]  | 36,404 [03.1, 25.0]  | 47,153 [09.2, 10.0]  | 136,996 [21.2, 08.8]     | 60,035 [08.9, 00.0]  | 31,785 [03.1, 25.0]  | 45,176 [09.2, 10.0]  |
| Swarna       | 135,270 [24.3, 07.6]   | 54,369 [08.4, 00.0]  | 37,510 [04.4, 17.2]  | 43,391 [11.5, 08.7]  | 128,040 [24.3, 07.6]     | 53,511 [08.4, 00.0]  | 32,899 [04.4, 17.2]  | 41,630 [11.5, 08.7]  |
| Zhenshan 97B | 103,556 [24.0, 16.1]   | 38,768 [08.2, 11.1]  | 33,355 [05.1, 16.7]  | 31,433 [10.7, 19.2]  | 98,935 [24.0, 16.1]      | 38,397 [08.2, 11.1]  | 29,792 [05.1, 16.7]  | 30,746 [10.7, 19.2]  |
| Total        | 1,931,713 [23.8, 10.3] | 772,689 [10.7, 02.9] | 554,679 [03.2, 21.1] | 604,345 [09.9, 13.7] | 1,824,074 [23.8, 10.3]   | 761,606 [10.7, 02.9] | 480,804 [03.2, 21.1] | 581,664 [09.9, 13.7] |
