# Supplementary material
Source: PubMed Central journal article supplement (PMC2718348)
Supplement: 0900992106_ST3_PDF.pdf [file 0900992106_ST3_PDF.pdf]

**Table S3. Properties of the input vectors  $\mathbf{x}_p^1$  for layer 1 and  $\mathbf{x}_p^2$  for layer 2 at a given position  $p$  are shown.  $\Sigma = \{A, C, G, T\}$  denotes the DNA alphabet, the strands are represented by  $s \in \{+, -\}$ ,  $\tau$  is either target  $t$  or reference variety  $ref$ . Unless defined otherwise,  $\Delta p \in \{-4, \dots, 4\}$ .**

|                                                                            | Formula                                                                                                                                                                                                         | Description                                                                                                                               | Size  |
|----------------------------------------------------------------------------|-----------------------------------------------------------------------------------------------------------------------------------------------------------------------------------------------------------------|-------------------------------------------------------------------------------------------------------------------------------------------|-------|
| $I_{max}$                                                                  | $I_{max}^p(\Delta p, \tau, s) = \max_{\sigma \in \Sigma} \log(I_{\tau, s}(p + \Delta p, \sigma))$                                                                                                               | Maximal intensities for target and reference variety, strand-wise in a 9 bp window                                                        | 36    |
| $I_{sec}$                                                                  | $I_{sec}^p(\Delta p, \tau, s) = \text{mean}_{\sigma \neq \sigma_{max}} \log(I_{\tau, s}(p + \Delta p, \sigma))$<br>where $\sigma_{max} = \arg \max_{\sigma \in \Sigma} \log(I_{\tau, s}(p + \Delta p, \sigma))$ | Average of the non-maximal intensities for target and reference variety, strand-wise in a 9 bp window                                     | 36    |
| $Q_1$                                                                      | $Q_1^p(\Delta p, \tau, s) = \log \frac{I_{max}^p(\Delta p, \tau, s)}{I_{max}^p(0, \tau, s)}$<br>where $\Delta p \in \{-4, \dots, -1, 1, \dots, 4\}$                                                             | Quotients of the maximal intensities at the neighbouring positions and $p$ for target and reference variety, strand-wise in a 9 bp window | 32    |
| $Q_2$                                                                      | $Q_2^p(\Delta p, s) = \log \frac{I_{max}^p(\Delta p, t, s)}{I_{max}^p(\Delta p, ref, s)}$                                                                                                                       | Quotients of the maximal intensities at $p$ for target and reference variety, strand-wise in a 9 bp window                                | 18    |
| $M$                                                                        | $M^p(\Delta p, \tau, s) = \delta(B_{\tau, s}(p + \Delta p), RS(p))$<br>where $\delta(i, j) = \begin{cases} 1 & i = j \\ 0 & i \neq j \end{cases}$                                                               | Mismatches between the raw base calls of the target/reference variety and the reference sequence, strand-wise in a 9 bp window            | 36    |
| $RS$                                                                       | $RS^p(\sigma) = \delta(RS(p), \sigma)$                                                                                                                                                                          | Binary vector indicating the presence of the base $\sigma$ in the reference at $p$                                                        | 4     |
| $f$                                                                        | $f^p(\sigma) = \sum_{\Delta=-13}^{\Delta=13} \delta(RS(p + \Delta), \sigma)$                                                                                                                                    | Frequency of each base $\sigma$ within the 25-mer                                                                                         | 4     |
| $H$                                                                        | $H^p = -\sum_{\sigma \in \Sigma} f^p(\sigma) \log(f^p(\sigma))$                                                                                                                                                 | Sequence entropy of the 25-mer                                                                                                            | 1     |
| $k$                                                                        | $k^p(\Delta p, \sigma) = [k_{type}^p(\Delta p, \sigma), k_{dom\ type}^p(\Delta p)]$<br>where $type \in \{exact, inexact, short, bulged\}$                                                                       | Occurrence counts of repetitive 25-mers in a 9 bp window                                                                                  | 558   |
| $v$                                                                        | $v^p(\gamma) = \begin{cases} 10 & \gamma = v(p) \\ 0 & \gamma \neq v(p) \end{cases}$                                                                                                                            | Vector indicating the variety origin of $p$                                                                                               | 19    |
| $\mathbf{x}^1 = [I_{max}, I_{sec}, Q_1, Q_2, M, RS, f, H, k, v]^T$         |                                                                                                                                                                                                                 |                                                                                                                                           | 744   |
| $b$                                                                        | $b^p(t) = [[c^p(t) \geq th_t]]$                                                                                                                                                                                 | Binary vector indicating whether $p$ passed $th_t$ for variety                                                                            | 361   |
| $c$                                                                        | $c_p(t)$                                                                                                                                                                                                        | Confidences at $p$ for all varieties                                                                                                      | 361   |
| $ind$                                                                      | $ind^p = \begin{cases} +1 & RS_{jap} \neq RS_{ind} \\ -1 & RS_{jap} = RS_{ind} \end{cases}$                                                                                                                     | Known polymorphism in the <i>ssp. indica</i> genome                                                                                       | 2     |
| $\mathbf{x}^2 = [I_{max}, I_{sec}, Q_1, Q_2, M, RS, f, H, k, b, c, ind]^T$ |                                                                                                                                                                                                                 |                                                                                                                                           | 1,449 |
