# Supplementary material
Source: PubMed Central journal article supplement (PMC2718348)
Supplement: 0900992106_ST4_PDF.pdf [file 0900992106_ST4_PDF.pdf]

**SI Table 4. Large-effect SNPs validation and false discovery rates**

| SNP Annotation     | # SNP sites <sup>a</sup> | # base calls <sup>b</sup> | # sequenced amplicons | Validation by dideoxy sequencing |       |       |
|--------------------|--------------------------|---------------------------|-----------------------|----------------------------------|-------|-------|
|                    |                          |                           |                       | True                             | False | FDR   |
| Premature stop     | 291                      | 1290                      | 90                    | 72                               | 18    | 0.20  |
| Intron splice stop | 101                      | 632                       | 80                    | 65                               | 16    | 0.20  |
| Start/stop codon   | 74                       | 562                       | 39                    | 39                               | 0     | 0.00  |
| <b>Total</b>       | 466                      | 2484                      | 209                   | 176                              | 34    | 0.163 |

<sup>a</sup> Number of SNP sites in the MBML-intersect data set with one or more cultivars different from the reference genome.

<sup>b</sup> Number of base calls in the MBML-intersect data set for all cultivars different from the reference at all SNP sites.
