# Supplementary material
Source: PubMed Central journal article supplement (PMC2718348)
Supplement: 0900992106_ST5_PDF.pdf [file 0900992106_ST5_PDF.pdf]

**SI Table 5. Chromosome 6 quantitative trait loci (QTL) for regions conditioning designated traits and heterotic loci (HL)<sup>a</sup> described in mapping studies of parental varieties, Minghui 63 and Zhenshan 97B.**

| Flanking Molecular Markers |       | Physical Coordinates of QTL and HL Regions |          | Trait                                | Reference |
|----------------------------|-------|--------------------------------------------|----------|--------------------------------------|-----------|
| 5'                         | 3'    | 5'                                         | 3'       |                                      |           |
| R2869                      | C474  | 642735                                     | 699380   | area of third leaf                   | (35)      |
| R2147                      | RZ667 | 6520988                                    | 6928404  | number of vascular bundles           | (35)      |
| RZ667                      | RM222 | 6928404                                    | 15578596 | area of third flag leaf per spikelet | (35)      |
| C952                       | Waxy  | 1355154                                    | 1764623  | root to shoot ratio                  | (36)      |
| R1952A                     | R2749 | 2260721                                    | 2573853  | root number                          | (36)      |
| C764                       | RM225 | 2770460                                    | 3416533  | plant height                         | (36)      |
| R2549                      | C962  | 24916395                                   | 28638436 | root fresh weight                    | (36)      |
| R2549                      | C962  | 24916395                                   | 28638436 | root number                          | (36)      |
| RG653                      | G342  | 29027995                                   | 30822714 | plant height                         | (36)      |
| C474                       | R3139 | 699380                                     | 1370856  | water absorption of cooked rice      | (37)      |
| Waxy                       | C1946 | 1764623                                    | 2090440  | length elongation of cooked rice     | (37)      |
| Waxy                       | C1946 | 1764623                                    | 2090440  | length of cooked rice                | (37)      |
| Waxy                       | C1946 | 1764623                                    | 2090440  | width expansion of cooked rice       | (37)      |
| R2869                      | C474  | 642735                                     | 699380   | shoot weight                         | (38)      |
| C952                       | Waxy  | 1355154                                    | 1764623  | amylose content                      | (39)      |
| C952                       | Waxy  | 1355154                                    | 1764623  | gel consistency                      | (39)      |
| R2869                      | C474  | 642735                                     | 699380   | thousand grain weight                | (40)      |
| Waxy                       | RM225 | 1764623                                    | 3416533  | tillers per plant                    | (40)      |
| C1496                      | RM204 | 2090558                                    | 3168374  | tillers per plant                    | (40)      |

<sup>a</sup>Heterotic loci are chromosomal regions associated with high yield performance in heterozygous vs homozygous plants (40)
