# Supplementary material
Source: PubMed Central journal article supplement (PMC2718348)
Supplement: 0900992106_ST6_PDF.pdf [file 0900992106_ST6_PDF.pdf]

SI Table 6. Introgression number, length, and sharing across varieties.

| Var          | VG       | Type  | Length (Mbp) |      |      |     |     |     |       | Blocks (100 kb) |     |     |     |     |     |       | Shared (same type) |        |        |        | Seg-ments | Mbp / Seg. |
|--------------|----------|-------|--------------|------|------|-----|-----|-----|-------|-----------------|-----|-----|-----|-----|-----|-------|--------------------|--------|--------|--------|-----------|------------|
|              |          |       | I            | J    | A    | I/J | I/A | J/A | total | I               | J   | A   | I/J | I/A | J/A | total | 2 Vars             | 3 Vars | 4 Vars | 5 Vars |           |            |
| Nipponbare   | J (temp) | adv.  | 0.1          | -    | 0.1  | -   | -   | -   | 0.2   | 1               | -   | 1   | -   | -   | -   | 2     | -                  | 1      | -      | -      | 2         | 0.10       |
| Tainung 67   | J (temp) | adv.  | 0.1          | -    | 0.1  | -   | -   | -   | 0.2   | 1               | -   | 1   | -   | -   | -   | 2     | -                  | 1      | -      | -      | 2         | 0.10       |
| M 202        | J (temp) | adv.  | 4            | -    | 0.7  | -   | 4.1 | -   | 8.8   | 40              | -   | 7   | -   | 41  | -   | 88    | 21                 | 5      | -      | -      | 37        | 0.24       |
| LTH          | J (temp) | adv.  | -            | -    | 0.1  | -   | -   | -   | 0.1   | -               | -   | 1   | -   | -   | -   | 1     | -                  | 1      | -      | -      | 1         | 0.10       |
| Cypress      | J (trop) | adv.  | 5.6          | -    | 4.3  | -   | 6.8 | -   | 16.7  | 56              | -   | 43  | -   | 68  | -   | 167   | 48                 | 21     | 3      | 1      | 91        | 0.18       |
| Moroberekan  | J (trop) | Trad. | 3.6          | -    | 5.3  | -   | 3.8 | -   | 12.7  | 36              | -   | 53  | -   | 38  | -   | 127   | 32                 | 16     | 5      | -      | 79        | 0.16       |
| Azucena      | J (trop) | Trad. | 4.2          | -    | 2.3  | -   | 1.8 | -   | 8.3   | 42              | -   | 23  | -   | 18  | -   | 83    | 29                 | 17     | 2      | -      | 61        | 0.14       |
| Dom-sufid    | J (aro)  | Trad. | 0.1          | -    | -    | -   | -   | -   | 0.1   | 1               | -   | -   | -   | -   | -   | 1     | 1                  | -      | -      | -      | 1         | 0.10       |
| N 22         | A        | Trad. | 7.3          | 16.5 | -    | 4.7 | -   | -   | 28.5  | 73              | 165 | -   | 47  | -   | -   | 285   | 77                 | 24     | 4      | -      | 195       | 0.15       |
| Rayada       | A (dw4)  | Trad. | 5.3          | 5.5  | -    | 0.9 | -   | -   | 11.7  | 53              | 55  | -   | 9   | -   | -   | 117   | 26                 | 11     | 3      | -      | 96        | 0.12       |
| FR13 A       | A        | Trad. | 8.2          | 3.6  | -    | 1.6 | -   | -   | 13.4  | 82              | 36  | -   | 16  | -   | -   | 134   | 22                 | 8      | 5      | -      | 106       | 0.13       |
| Dular        | A        | Trad. | 5.1          | 9.7  | -    | 1.6 | -   | -   | 16.4  | 51              | 97  | -   | 16  | -   | -   | 164   | 56                 | 15     | 2      | -      | 102       | 0.16       |
| Aswina       | I (dw3)  | Trad. | -            | 3.6  | 17.3 | -   | -   | 3.6 | 24.5  | -               | 36  | 173 | -   | -   | 36  | 245   | 47                 | 14     | 4      | 1      | 151       | 0.16       |
| Pokkali      | I        | Trad. | -            | 2.7  | 8.3  | -   | -   | 1.1 | 12.1  | -               | 27  | 83  | -   | -   | 11  | 121   | 29                 | 6      | 4      | -      | 85        | 0.14       |
| Sadu-cho     | I        | Trad. | -            | 4.7  | 1.9  | -   | -   | 0.7 | 7.3   | -               | 47  | 19  | -   | -   | 7   | 73    | 25                 | 7      | 4      | -      | 60        | 0.12       |
| ZhenShan 97B | I        | adv.  | -            | 13   | 1.8  | -   | -   | 3.5 | 18.3  | -               | 130 | 18  | -   | -   | 35  | 183   | 40                 | 9      | 1      | 1      | 106       | 0.17       |
| Swarna       | I        | adv.  | -            | 2.8  | 3.4  | -   | -   | 0.7 | 6.9   | -               | 28  | 34  | -   | -   | 7   | 69    | 24                 | 9      | 2      | -      | 61        | 0.11       |
| Minghui 63   | I        | adv.  | -            | 10.9 | 3.8  | -   | -   | 0.9 | 15.6  | -               | 109 | 38  | -   | -   | 9   | 156   | 58                 | 13     | 1      | -      | 67        | 0.23       |
| IR64-21      | I        | adv.  | -            | 7.1  | 2.8  | -   | -   | 0.9 | 10.8  | -               | 71  | 28  | -   | -   | 9   | 108   | 48                 | 13     | 5      | 1      | 66        | 0.16       |
| SHZ2         | I        | adv.  | -            | 3.8  | 1.2  | -   | -   | 1.4 | 6.4   | -               | 38  | 12  | -   | -   | 14  | 64    | 22                 | 7      | 3      | 1      | 42        | 0.15       |
| Overall      |          |       |              |      |      |     |     |     |       |                 |     |     |     |     |     | 295   | 66                 | 12     | 1      |        | 0.15±0.40 |            |
