# Supplementary material
Source: PubMed Central journal article supplement (PMC2718348)
Supplement: 0900992106_ST7_PDF.pdf [file 0900992106_ST7_PDF.pdf]

**SI Table 7. Coefficient of Parentage for OryzaSNP varieties with known breeding histories calculated from pedigrees in the IRIS database (<http://iris.irri.org>).**

|         | Npb | TNG67  | M202           | Cyp    | IR64-21 | SHZ2   | Swar   | MH63 | ZS97B |
|---------|-----|--------|----------------|--------|---------|--------|--------|------|-------|
| Npb     |     | 0.0461 | x <sup>a</sup> | x      | x       | x      | 0.0101 | x    | x     |
| TNG67   |     |        | 0.0004         | 0.0002 | 0.0049  | 0.0024 | 0.0560 | x    | x     |
| M202    |     |        |                | 0.0002 | 0.0097  | 0.0040 | 0.0068 | x    | x     |
| Cyp     |     |        |                |        | 0.0224  | 0.0140 | 0.0018 | x    | x     |
| IR64-21 |     |        |                |        |         | 0.1016 | 0.0776 | x    | x     |
| SHZ2    |     |        |                |        |         |        | x      | x    | x     |
| Swar    |     |        |                |        |         |        |        | x    | x     |
| MH63    |     |        |                |        |         |        |        |      | x     |
| ZS97B   |     |        |                |        |         |        |        |      |       |

<sup>a</sup> x – no shared parentage
